1 **A novel in-cell ELISA assay allows rapid and automated quantification of SARS-CoV-2 to**  
2 **analyse neutralizing antibodies and antiviral compounds**

3

4 Lara Schöler<sup>1\*</sup>, Vu Thuy Khanh Le-Trilling<sup>1\*</sup>, Mareike Eilbrecht<sup>1</sup>, Denise Mennerich<sup>1</sup>, Olympia  
5 E. Anastasiou<sup>1</sup>, Adalbert Krawczyk<sup>1,2</sup>, Anke Herrmann<sup>1</sup>, Ulf Dittmer<sup>1</sup>, and Mirko Trilling<sup>1#</sup>

6

7 <sup>1</sup>Institute for Virology, University Hospital Essen, University of Duisburg-Essen, Essen, Germany

8 <sup>2</sup>Department of Infectious Diseases, West German Centre of Infectious Diseases, University  
9 Hospital Essen, University of Duisburg-Essen, Essen, Germany

10 \* These authors contributed equally to this work as the co-first authors.

11

12 **Keywords:** SARS-CoV-2; COVID-19; neutralizing; antibodies; interferon

13 **Running title:** Rapid & automated SARS-CoV-2 icNT assay

14 **Brief summary:** Knowledge concerning SARS-CoV-2-neutralizing antibodies (NAbs) is  
15 indispensable for COVID-19 convalescent plasma selection, evaluation of vaccines, and immunity  
16 certificates. Our in-cell ELISA (icELISA) test allows rapid (<48h) and high-throughput detection  
17 and quantification of SARS-CoV-2-specific NAbs and antiviral activity of drug candidates.

18

19 #Correspondence to  
20 Mirko Trilling; [Mirko.Trilling@uk-essen.de](mailto:Mirko.Trilling@uk-essen.de); ORCID: M Trilling 0000-0003-3659-3541

21 Mailing address:

22 University Hospital Essen  
23 University of Duisburg-Essen  
24 Institute for Virology  
25 Virchowstr. 179  
26 45147 Essen  
27 Germany

28 **Abstract**

29 The coronavirus disease 2019 (COVID-19) caused by the severe acute respiratory syndrome  
30 coronavirus 2 (SARS-CoV-2) is currently the most pressing medical and socioeconomic challenge.  
31 Constituting important correlates of protection, determination of virus-neutralizing antibodies  
32 (NAbs) is indispensable for convalescent plasma selection, vaccine candidate evaluation, and  
33 immunity certificates. In contrast to standard serology ELISAs, plaque reduction neutralization  
34 tests (PRNTs) are laborious, time-consuming, expensive, and restricted to specialized laboratories.  
35 To replace microscopic counting-based SARS-CoV-2 PRNTs by a novel assay exempt from  
36 genetically modified viruses, which are inapplicable in most diagnostics departments, we  
37 established a simple, rapid, and automated SARS-CoV-2 neutralization assay employing an in-cell  
38 ELISA (icELISA) approach.

39 After optimization of various parameters such as virus-specific antibodies, cell lines, virus doses,  
40 and duration of infection, SARS-CoV-2-infected cells became amenable as direct antigen source  
41 for quantitative icELISA. Using commercially available nucleocapsid protein-specific antibodies,  
42 viral infection could easily be quantified in human and highly permissive Vero E6 cells by  
43 icELISA. Antiviral agents such as human sera containing NAbs or antiviral interferons dose-  
44 dependently reduced the SARS-CoV-2-specific signal. Applying increased infectious doses, the  
45 icNT was superior to PRNT in discriminating convalescent sera with high from those with  
46 intermediate neutralizing capacities.

47 The SARS-CoV-2 icELISA test allows rapid (<48h in total, read-out in seconds) and automated  
48 quantification of virus infection in cell culture to evaluate the efficacy of NAbs as well as antiviral  
49 drugs, using reagents and equipment present in most routine diagnostics departments. We propose  
50 the icELISA and the icNT for COVID-19 research and diagnostics.

## 51 **Introduction**

52 By the time of writing, more than 6.3 million people experienced a laboratory confirmed infection  
53 with the severe acute respiratory syndrome coronavirus (SARS-CoV)-2 and more than 378,000  
54 people died while having coronavirus infectious disease 19 (COVID-19). First surveillance studies  
55 and calculations of excess mortality rates indicate that the precise number of infections and the  
56 true number of fatalities exceed above-mentioned numbers by far.

57 Coronaviruses (CoVs) are positive strand RNA viruses widespread among various vertebrate hosts  
58 including bats and rodents (1). Together with four seasonal human CoVs (hCoVs) as well as the  
59 two other emerging hCoVs SARS-CoV-1 and MERS-CoV, SARS-CoV-2 is the seventh hCoV  
60 causing widespread human diseases (2). In December 2019, SARS-CoV-2 was first recognized in  
61 the Hubei province in China (3) from where it rapidly spread throughout the world. In addition to  
62 its genetic similarity, SARS-CoV-2 shares some clinical characteristics with SARS-CoV-1 (4), but  
63 also exhibits some highly relevant particularities such as an increased spreading efficacy and the  
64 length of the course of disease (5). On January 31, the WHO declared the SARS-CoV-2 outbreak  
65 a Public Health Emergency of International Concern. On March 11, 2020, WHO started to denote  
66 the outbreak a global pandemic. Since its beginning, the centre of the pandemic shifted from China,  
67 via Europe and Northern Americas to Central and Southern Americas. This dynamic nature of the  
68 pandemic poses an inherent danger of repetitive local and temporal reintroduction circles. Thus,  
69 even countries which coped relatively well with the first wave must prepare in terms of diagnostics  
70 capacities for potential future re-emergences.

71 Most SARS-CoV-2 infections lead to mild or moderate illnesses. However, a considerable fraction  
72 of cases proceeds to severe pneumonia or life-threatening acute respiratory distress syndrome.

73 Elderly individuals and people with pre-existing comorbidities such as impaired immunity, chronic  
74 respiratory diseases, cardiovascular diseases, and cancer are more prone to suffer from severe  
75 COVID-19. The case fatality rate (CFR) is difficult to calculate in the midst of the pandemic.  
76 Depending on the age, CFR estimates of up to 18.4% for individuals older than 80 years and 1.38%  
77 (range 1.23 - 1.53) for the general population have been reported (6).

78 Given the extent, pace, and severity of the COVID-19 pandemic, diagnostics departments even in  
79 countries with highly developed medical systems struggle to provide sufficient and timely test  
80 capacities. Since nucleic acid-based pathogen detection, usually by quantitative RT-PCR based on  
81 naso- or oropharyngeal swabs, has a very short window of opportunity, assays detecting long-  
82 lasting immune responses such as antibodies are required to monitor virus spread and to estimate  
83 potential herd immunity.

84 With some delay, most infected individuals raise a detectable humoral immune response including  
85 specific immunoglobulins (Ig) M, IgA, and IgG (7-9). Neutralizing antibodies (NAbs) bind and  
86 abrogate the function of viral proteins such as the SARS-CoV-2 Spike (S) protein that are essential  
87 for virus entry into host cells, e.g., through recognition of the cognate receptor ACE2 (10).  
88 Accordingly, monoclonal NAbs exhibit strong therapeutic and prophylactic efficacies in SARS-  
89 CoV-2-infected human ACE2-transgenic mice (11). A recent vaccination study conducted in non-  
90 human primates identified NAbs as correlate of protection (12), indicating that a human SARS-  
91 CoV-2 vaccine should also be capable to elicit potent NAb responses. Additionally, monoclonal  
92 NAbs and NAb-containing hyper-immunoglobulin preparations may be applicable as treatment  
93 against COVID-19 (13). NAbs are also the backbone of convalescent plasma (CP) therapies (14-  
94 16) that are one of 7 clinical recommendations of the IDSA (17). Based on the havoc COVID-19  
95 causes to the global economy, immunity passports and vaccination certificates, documenting

96 protection through NAbs, have been discussed (e.g., (18)). Taken together, SARS-CoV-2-specific  
97 NAbs and their quantification appear to be of central importance for the medical and socio-  
98 economic management of the pandemic.

99 Different types of neutralization tests (NT) have been developed for SARS-CoV-2. However, to  
100 our knowledge, these assays rely on laborious microscopic counting of virus plaques or antibody-  
101 stained foci by trained personnel (19-21) or on genetically modified viruses such as transgenic  
102 SARS-CoV-2 mutants (22) or pseudo-typed viruses (e.g., Vesicular stomatitis virus [VSV] or  
103 Human immunodeficiency virus [HIV]) expressing the S protein of SARS-CoV-2 (23, 24).  
104 Genetically modified viruses are generally prohibited in routine diagnostics laboratories and  
105 usually not applicable in less developed regions. Due to the central importance of NAbs and the  
106 limitations of the currently available methodology, we established a cheap, simple, fast, reliable,  
107 and automatable in-cell ELISA (icELISA)-based icNT applicable in most routine diagnostics  
108 departments.

109

## 110 **Methods**

### 111 *Cells, viruses, interferons, and sera*

112 Caco-2 (ATCC HTB-37) and Vero E6 (ATCC CRL-1586) were cultivated in Roswell Park  
113 Memorial Institute (RPMI) and Dulbecco's minimal essential medium (DMEM), respectively,  
114 supplemented with 10% (v/v) FCS, penicillin, and streptomycin at 37°C in an atmosphere of 5%  
115 CO<sub>2</sub>. SARS-CoV-2 was isolated from a patient sample using Vero E6 and confirmed by SARS-  
116 CoV-2 diagnostic qRT-PCR. Viral titers were determined by TCID<sub>50</sub> titration. Human IFN $\alpha$ 2 and  
117 IFN $\beta$  were purchased from PBL Assay Science (#11101) and Peprotech (#300-02BC),

118 respectively. The collection of serum samples has been approved by the ethics committee of the  
119 medical faculty of the University of Duisburg- Essen (20-9208-BO). Anti-SARS-CoV-2 IgG  
120 antibodies were detected using ELISA detecting SARS-CoV-2 Spike protein (Euroimmun  
121 Medizinische Labordiagnostika, Germany) according to manufacturer's instructions

#### 122 *SARS-CoV-2 icELISA and icNT*

123 Defined doses of SARS-CoV-2 were incubated with different serum dilutions for 1 h at 37°C prior  
124 to Vero E6 infection. Neutralizing capacities were evaluated by icELISA. A detailed icELISA/  
125 icNT protocol is provided in Suppl. File 1. The  $\alpha$ -N mAb1 (ABIN6952435),  $\alpha$ -N mAb2  
126 (ABIN6952433),  $\alpha$ -S Ab (ABIN1031551), and POD-coupled secondary antibodies (Dianova)  
127 were used.

128

## 129 **Results**

### 130 *Quantification of SARS-CoV-2 replication and its inhibition by antiviral compounds using* 131 *icELISA*

132 We hypothesized that virus-encoded proteins expressed by infected cells should be amenable as  
133 source of viral antigens for the detection and quantification by ELISA. We optimized the  
134 experimental conditions such as cell type, virus dose, infection period, cell fixation method,  
135 blocking reagent, as well as type and concentrations of primary and secondary antibodies (Fig. 1  
136 and data not shown). As described in the Methods section and provided as detailed laboratory  
137 protocol in the supplementary information (Suppl. File 1), we compared different commercially  
138 available antibodies for the icELISA-based quantification of SARS-CoV-2 proteins. Based on

139 existing data on virus entry (10), we infected human Caco-2 cells with graded virus doses (ranging  
140 from 0.03125 to 2 PFU/cell). At 3 days post infection (d p .i.), we fixed and stained the cells with  
141 different antibodies either recognizing the S or the N protein of SARS-CoV-2. In accordance with  
142 high expression level of the N protein (25, 26), certain N-specific mouse IgGs exhibited a signal-  
143 to-noise ratio favourable for icELISA (Fig. 1A). A comparison of Vero E6 and human Caco-2  
144 cells revealed that the icELISA is applicable to different cells (Fig. 1B).

145 Since the icELISA signal directly correlated with viral replication and viral antigen expression, we  
146 tested its ability to determine antiviral effects. Human Caco-2 cells were treated with graded  
147 concentrations of human interferon (IFN)  $\alpha 2$  or IFN $\beta$  and infected 3 h later with SARS-CoV-2. At  
148 3 d p.i., viral antigen amounts were quantified by icELISA. In accordance with a recent clinical  
149 phase 2 trial (27), IFN $\beta$  exhibited strong and dose-dependent antiviral activity against SARS-CoV-  
150 2 in human cells (Fig. 1C), indicating that the icELISA is applicable for future experiments  
151 addressing the efficacy of potential antiviral drugs in human cells.

152 Despite different start MOIs, similar icELISA signals were observed at 72 h p.i. in Vero E6 (Fig.  
153 1B), indicating multiple rounds of virus amplification and extraordinary fast replication kinetics  
154 of SARS-CoV-2 in Vero E6 cells, consistent with previous studies (28). To test if shorter infection  
155 periods might result in virus dose-dependent signals, we analysed infected Vero E6 cells after 6,  
156 15, and 22 h. SARS-CoV-2 was readily detectable in Vero E6 cells by icELISA already at 6 h p.i.  
157 (Fig. 1D-F).

158 Taken together, these data indicate that the icELISA allowed rapid identification and quantification  
159 of SARS-CoV-2 replication in Vero E6 and human cells as well as its inhibition by antiviral  
160 compounds.

161 *Neutralization tests based on icELISA allow the quantification of SARS-CoV-2 NABs as early as 6*  
162 *hours post infection*

163 Since the icELISA allowed simple and automated quantification of SARS-CoV-2-dependent  
164 antigen expression, we tested if an icELISA-based neutralization test (icNT) can be established.  
165 We infected Vero E6 cells for 6, 15, and 24 h with graded SARS-CoV-2 infection doses (500,  
166 5000 or 50,000 PFU/well) in the absence or presence of 2 convalescent sera in 3 different  
167 concentrations (1/20, 1/40, and 1/80 dilution). Using the high infectious dose, viral antigens  
168 became dose-dependently detectable by icELISA as early as 6 h p.i. (Fig. 2A). Both immune sera  
169 strongly and dose-dependently neutralized the virus-induced signal (Fig. 2B). At 15 h p.i., the  
170 intermediate infectious virus dose also became detectable (Fig. 2C) and both human sera  
171 efficiently neutralized the infection (Fig. 2D). At 24 h p.i., all infection conditions resulted in a  
172 strong icELISA signal (Fig. 2E), indicating that infectious doses as low as 500 PFU/well are  
173 detectable by icELISA after 24 h of infection. Even the strong icELISA signal at 24 h p.i. was  
174 dose-dependently neutralized by both sera (Fig. 2F). Please note that the neutralizing capacity of  
175 given sera dilutions was less pronounced at higher virus doses as compared to lower virus doses,  
176 as indicated by residual icELISA signals.

177 Taken together, the icELISA resulted in a time- and virus dose-dependent signal constituting a  
178 surrogate for SARS-CoV-2 infection and replication. The fact that the infection and the resulting  
179 icELISA signal were neutralized by NABs present in immune sera indicated that the fast and  
180 automated icELISA format is applicable for icNTs.

181 *The icNT results correlate with the standard SARS-CoV-2 neutralization test conducted by staining*  
182 *of virus foci and microscopic counting*



183 Although most SARS-CoV-2 NTs have not been formally validated and certified, classic plaque  
184 reduction neutralization tests (PRNT) are currently considered to represent the gold standard for  
185 the detection of SARS-CoV-2-specific NAbs. Various commercially available IgM, IgA, and IgG  
186 ELISAs have been compared to PRNTs (e.g., (28)). To validate the novel icNT, 20 sera - 10  
187 positive for SARS-CoV-2-specific IgG as determined using the Euroimmun ELISA (ELISA ratio:  
188 1.26 to 11.39) and 10 ELISA-negative sera (ELISA ratio < 0.9) - were compared side-by-side by  
189 icNT and standard PRNT using 200 PFU/well (Fig. 3A). One set was processed by icNT, while  
190 for the other set virus foci were stained using an antibody-based AEC staining method and  
191 manually counted by microscopy. The icNT correctly recognized all 10 positive and all 10 negative  
192 sera (Fig. 3B), indicating optimal sensitivity and specificity. In total, both methods gave almost  
193 congruent results in terms of the highest dilution resulting in 50% neutralization (Pearson's  
194 correlation coefficient 0.965), highlighting excellent test performances of the icNT compared to  
195 the PRNT.

196 *The icNT discriminates SARS-CoV-2-neutralizing sera from non-immune sera and provides*  
197 *superior resolution when increased virus doses are used*

198 Standard SARS-CoV-2 NTs base on microscopic counting of plaques or antibody-stained virus  
199 foci. To enable plaque/foci recognition and individual counting by trained personnel, a countable  
200 number of PFU must be applied in PRNTs. Depending on the PRNT protocol, 100 (19) to 400  
201 PFU (20) are used to infect each well. Based on previous experiences with virus neutralization  
202 experiments (29, 30), we suspected that lower infectious doses might be more susceptible to NAbs  
203 than higher virus doses, e.g., through altered ratios of NAbs and antigenic regions determining  
204 neutralization, such as the receptor binding domain (RBD) of the S protein of SARS-CoV-2. To  
205 address if the icNT can provide superior resolution in terms of discriminating intermediate from

206 strong NAb responses in convalescent sera, we selected prototypical sera and conducted  
207 comparative icNTs applying either 200 PFU/well or 40-fold more virus (8000 PFU/well). While  
208 all positive sera clearly neutralized the low infectious dose of 200 PFU/well (Fig. 4A-C), the  
209 neutralizing capacity of the same sera considerably differed at the more restrictive high virus dose  
210 (Fig. 4D-F). Despite their neutralizing capacity at low dose infections, some of the convalescent  
211 sera (e.g., serum #19) almost did not show appreciable neutralization in high MOI infection and  
212 did not reach the typical benchmark of 50% neutralization at a 1/8 serum dilution. Thus, we  
213 concluded that the icNT principle allows higher infectious doses which appear to discriminate  
214 intermediate from superior SARS-CoV-2 neutralizing antibody titres.

215

## 216 **Discussion**

217 We established a novel icELISA-based test principle for detection and quantification of SARS-  
218 CoV-2. Given the excellent signal-to-noise ratio between infected and uninfected cells, the test  
219 was applicable to quantify the efficacy of antiviral compounds, here shown for IFN $\beta$ , and SARS-  
220 CoV-2-specific NAbs present in immune sera.

221 Compared to icELISA and icNT, standard virus titrations and PRNTs are far more laborious, time  
222 consuming, and expensive - not to speak from subjective and expectation biases upon usage for  
223 research. The entire icNT can be processed in less than 2 days including the infection period. Given  
224 that the protocol includes an early fixation step using 4% (w/v) paraformaldehyde which  
225 inactivates SARS-CoV-2, all subsequent steps can be processed outside the biosafety level 3  
226 laboratory. The actual data acquisition is conducted within seconds, using standard ELISA plate  
227 readers present in most routine diagnostics departments. The icELISA and icNT provide increased

228 data quality and precision by generating continuous data sets. Since the detection antibodies can  
229 be applied in icELISA and icNTs in relatively high dilutions (1/5000 and 1/2000 of primary and  
230 secondary antibody, respectively), the assay is relatively cheap (in our case, around 0.10 € per well  
231 for both antibodies and the TMB peroxidase ELISA substrate). The specificity of the icELISA and  
232 icNT is provided by the defined SARS-CoV-2 added to the cell cultures on purpose. The primary  
233 and secondary detection antibodies just serve to visualize and quantify viral antigens. Thus, SARS-  
234 CoV-2-specific antibodies can be applied for icELISA detection notwithstanding potential cross-  
235 recognition of other CoVs such as hCoV-HKU1 or hCoV-OC43 - simply because these viruses  
236 are not present in the culture. Obviously, such antibodies recognizing conserved residues cannot  
237 be used for classic antigen-recognizing ELISAs due to their inability to discriminate coronaviruses.  
238 More virus (>1 PFU/cell) can be applied to icNTs. Such high-PFU icNTs scrutinize the virus-  
239 neutralizing capacity of sera more strictly, enabling a higher resolution compared to PRNT assays  
240 which all rely on low virus numbers. It is tempting to speculate that sera exhibiting superior  
241 neutralization in high PFU icNT might be more beneficial in CP therapies.

242 NTs based on pseudo-typed viruses using heterologous expression of the SARS-CoV-2-encoded  
243 S by viruses may have certain advantages. However, genetically modified viruses are inapplicable  
244 by law in various routine diagnostics departments and usually unavailable in less developed  
245 countries. Without the use of genuine infectious viruses, assays relying on pseudo-typed viruses  
246 do not fully interrogate the full spectrum of antiviral effects for example if other viral proteins  
247 influence the system, e.g., by complement activation (31).

248 Taken together, we propose the icELISA and icNT for the quantification of SARS-CoV-2  
249 replication and its inhibition by NAbs and antiviral compounds. By changing the detection  
250 antibody, the test principle is transferable to all other viruses.

251 **Acknowledgments**

252 V.T.K.L.-T. and L.S. contributed equally to this work. We thank Benjamin Katschinski and  
253 Kerstin Wohlgemuth for excellent technical assistance. M.T. was supported by the Stiftung  
254 Universitätsmedizin Essen, Kulturstiftung Essen, the Else-Kröner Promotionskolleg ELAN, and  
255 the Deutsche Forschungsgemeinschaft (DFG) through grants RTG 1949/2, TR1208/1-1, and  
256 TR1208/2-1.

257 **Disclaimer**

258 The funders had no role in study design, data collection and analysis, decision to publish, or  
259 preparation of the manuscript. The authors have no conflicts of interest.

260 **Author's contributions**

261 L.S., V.T.K.L.-T., M.E., and D.M. performed research. O.E.A., A.K., A.H. provided essential  
262 reagents. L.S., V.T.K.L.-T., and M.T. analysed data. L.S., V.T.K.L.-T., U.D. and M.T. interpreted  
263 data. V.T.K.L.-T and M.T. supervised the project. L.S., V.T.K.L.-T., and M.T. wrote the  
264 manuscript. All authors reviewed the manuscript.

## 265 References

- 266 1. Cui J, Li F, Shi ZL. Origin and evolution of pathogenic coronaviruses. *Nat Rev Microbiol.* 2019  
267 Mar;17(3):181-92.
- 268 2. Chen Y, Liu Q, Guo D. Emerging coronaviruses: Genome structure, replication, and pathogenesis. *J Med*  
269 *Virol.* 2020 Apr;92(4):418-23.
- 270 3. Zhu N, Zhang D, Wang W, Li X, Yang B, Song J, et al. A Novel Coronavirus from Patients with  
271 Pneumonia in China, 2019. *N Engl J Med.* 2020 Feb 20;382(8):727-33.
- 272 4. Liu J, Zheng X, Tong Q, Li W, Wang B, Sutter K, et al. Overlapping and discrete aspects of the pathology  
273 and pathogenesis of the emerging human pathogenic coronaviruses SARS-CoV, MERS-CoV, and 2019-nCoV. *J*  
274 *Med Virol.* 2020 May;92(5):491-4.
- 275 5. Mo P, Xing Y, Xiao Y, Deng L, Zhao Q, Wang H, et al. Clinical characteristics of refractory COVID-19  
276 pneumonia in Wuhan, China. *Clin Infect Dis.* 2020 Mar 16.
- 277 6. Verity R, Okell LC, Dorigatti I, Winskill P, Whittaker C, Imai N, et al. Estimates of the severity of  
278 coronavirus disease 2019: a model-based analysis. *Lancet Infect Dis.* 2020 Mar 30.
- 279 7. Zhao J, Yuan Q, Wang H, Liu W, Liao X, Su Y, et al. Antibody responses to SARS-CoV-2 in patients of  
280 novel coronavirus disease 2019. *Clin Infect Dis.* 2020 Mar 28.
- 281 8. Xiang F, Wang X, He X, Peng Z, Yang B, Zhang J, et al. Antibody Detection and Dynamic Characteristics  
282 in Patients with COVID-19. *Clin Infect Dis.* 2020 Apr 19.
- 283 9. Zhao R, Li M, Song H, Chen J, Ren W, Feng Y, et al. Early detection of SARS-CoV-2 antibodies in  
284 COVID-19 patients as a serologic marker of infection. *Clin Infect Dis.* 2020 May 1.
- 285 10. Hoffmann M, Kleine-Weber H, Schroeder S, Kruger N, Herrler T, Erichsen S, et al. SARS-CoV-2 Cell  
286 Entry Depends on ACE2 and TMPRSS2 and Is Blocked by a Clinically Proven Protease Inhibitor. *Cell.* 2020 Apr  
287 16;181(2):271-80 e8.
- 288 11. Cao Y, Su B, Guo X, Sun W, Deng Y, Bao L, et al. Potent neutralizing antibodies against SARS-CoV-2  
289 identified by high-throughput single-cell sequencing of convalescent patients' B cells. *Cell.* 2020 May 18.
- 290 12. Yu J, Tostanoski LH, Peter L, Mercado NB, McMahan K, Mahrokhian SH, et al. DNA vaccine protection  
291 against SARS-CoV-2 in rhesus macaques. *Science.* 2020 May 20.
- 292 13. Wu Y, Wang F, Shen C, Peng W, Li D, Zhao C, et al. A noncompeting pair of human neutralizing  
293 antibodies block COVID-19 virus binding to its receptor ACE2. *Science.* 2020 May 13.
- 294 14. Roback JD, Guarner J. Convalescent Plasma to Treat COVID-19: Possibilities and Challenges. *JAMA.*  
295 2020 Mar 27.
- 296 15. Duan K, Liu B, Li C, Zhang H, Yu T, Qu J, et al. Effectiveness of convalescent plasma therapy in severe  
297 COVID-19 patients. *Proc Natl Acad Sci U S A.* 2020 Apr 28;117(17):9490-6.
- 298 16. Shen C, Wang Z, Zhao F, Yang Y, Li J, Yuan J, et al. Treatment of 5 Critically Ill Patients With COVID-  
299 19 With Convalescent Plasma. *JAMA.* 2020 Mar 27.
- 300 17. Bhimraj A, Morgan RL, Shumaker AH, Lavergne V, Baden L, Cheng VC, et al. Infectious Diseases  
301 Society of America Guidelines on the Treatment and Management of Patients with COVID-19. *Clin Infect Dis.*  
302 2020 Apr 27.
- 303 18. Phelan AL. COVID-19 immunity passports and vaccination certificates: scientific, equitable, and legal  
304 challenges. *Lancet.* 2020 May 4.
- 305 19. Manenti A, Maggetti M, Casa E, Martinuzzi D, Torelli A, Trombetta CM, et al. Evaluation of SARS-CoV-  
306 2 neutralizing antibodies using a CPE-based colorimetric live virus micro-neutralization assay in human serum  
307 samples. *J Med Virol.* 2020 May 8.
- 308 20. Okba NMA, Muller MA, Li W, Wang C, GeurtsvanKessel CH, Corman VM, et al. Severe Acute  
309 Respiratory Syndrome Coronavirus 2-Specific Antibody Responses in Coronavirus Disease 2019 Patients. *Emerg*  
310 *Infect Dis.* 2020 Apr 8;26(7).
- 311 21. Perera RA, Mok CK, Tsang OT, Lv H, Ko RL, Wu NC, et al. Serological assays for severe acute  
312 respiratory syndrome coronavirus 2 (SARS-CoV-2), March 2020. *Euro Surveill.* 2020 Apr;25(16).
- 313 22. Muruato AE, Fontes-Garfias CR, Ren P, Garcia-Blanco MA, Menachery VD, Xie XD, et al. A high-  
314 throughput neutralizing antibody assay for COVID-19 diagnosis and vaccine evaluation. *bioRxiv.*  
315 2020:2020.05.21.109546.
- 316 23. Ni L, Ye F, Cheng ML, Feng Y, Deng YQ, Zhao H, et al. Detection of SARS-CoV-2-Specific Humoral and  
317 Cellular Immunity in COVID-19 Convalescent Individuals. *Immunity.* 2020 May 3.

- 318 24. Nie J, Li Q, Wu J, Zhao C, Hao H, Liu H, et al. Establishment and validation of a pseudovirus  
319 neutralization assay for SARS-CoV-2. *Emerg Microbes Infect.* 2020 Dec;9(1):680-6.
- 320 25. Bezstarosti K, Lamers MM, Haagmans BL, Demmers JAA. Targeted Proteomics for the Detection of  
321 SARS-CoV-2 Proteins. *bioRxiv.* 2020:2020.04.23.057810.
- 322 26. Finkel Y, Mizrahi O, Nachshon A, Weingarten-Gabbay S, Yahalom-Ronen Y, Tamir H, et al. The coding  
323 capacity of SARS-CoV-2. *bioRxiv.* 2020:2020.05.07.082909.
- 324 27. Hung IF, Lung KC, Tso EY, Liu R, Chung TW, Chu MY, et al. Triple combination of interferon beta-1b,  
325 lopinavir-ritonavir, and ribavirin in the treatment of patients admitted to hospital with COVID-19: an open-label,  
326 randomised, phase 2 trial. *Lancet.* 2020 May 8.
- 327 28. Ogando NS, Dalebout TJ, Zevenhoven-Dobbe JC, Limpens RW, van der Meer Y, Caly L, et al. SARS-  
328 coronavirus-2 replication in Vero E6 cells: replication kinetics, rapid adaptation and cytopathology. *bioRxiv.*  
329 2020:2020.04.20.049924.
- 330 29. Corrales-Aguilar E, Trilling M, Reinhard H, Falcone V, Zimmermann A, Adams O, et al. Highly individual  
331 patterns of virus-immune IgG effector responses in humans. *Med Microbiol Immunol.* 2016 Oct;205(5):409-24.
- 332 30. Reinhard H, Le VT, Ohlin M, Hengel H, Trilling M. Exploitation of herpesviral transactivation allows  
333 quantitative reporter gene-based assessment of virus entry and neutralization. *PLoS One.* 2011 Jan 17;6(1):e14532.
- 334 31. Gao T, Hu M, Zhang X, Li H, Zhu L, Liu H, et al. Highly pathogenic coronavirus N protein aggravates  
335 lung injury by MASP-2-mediated complement over-activation. *medRxiv.* 2020:2020.03.29.20041962.

## Figures and figure legends

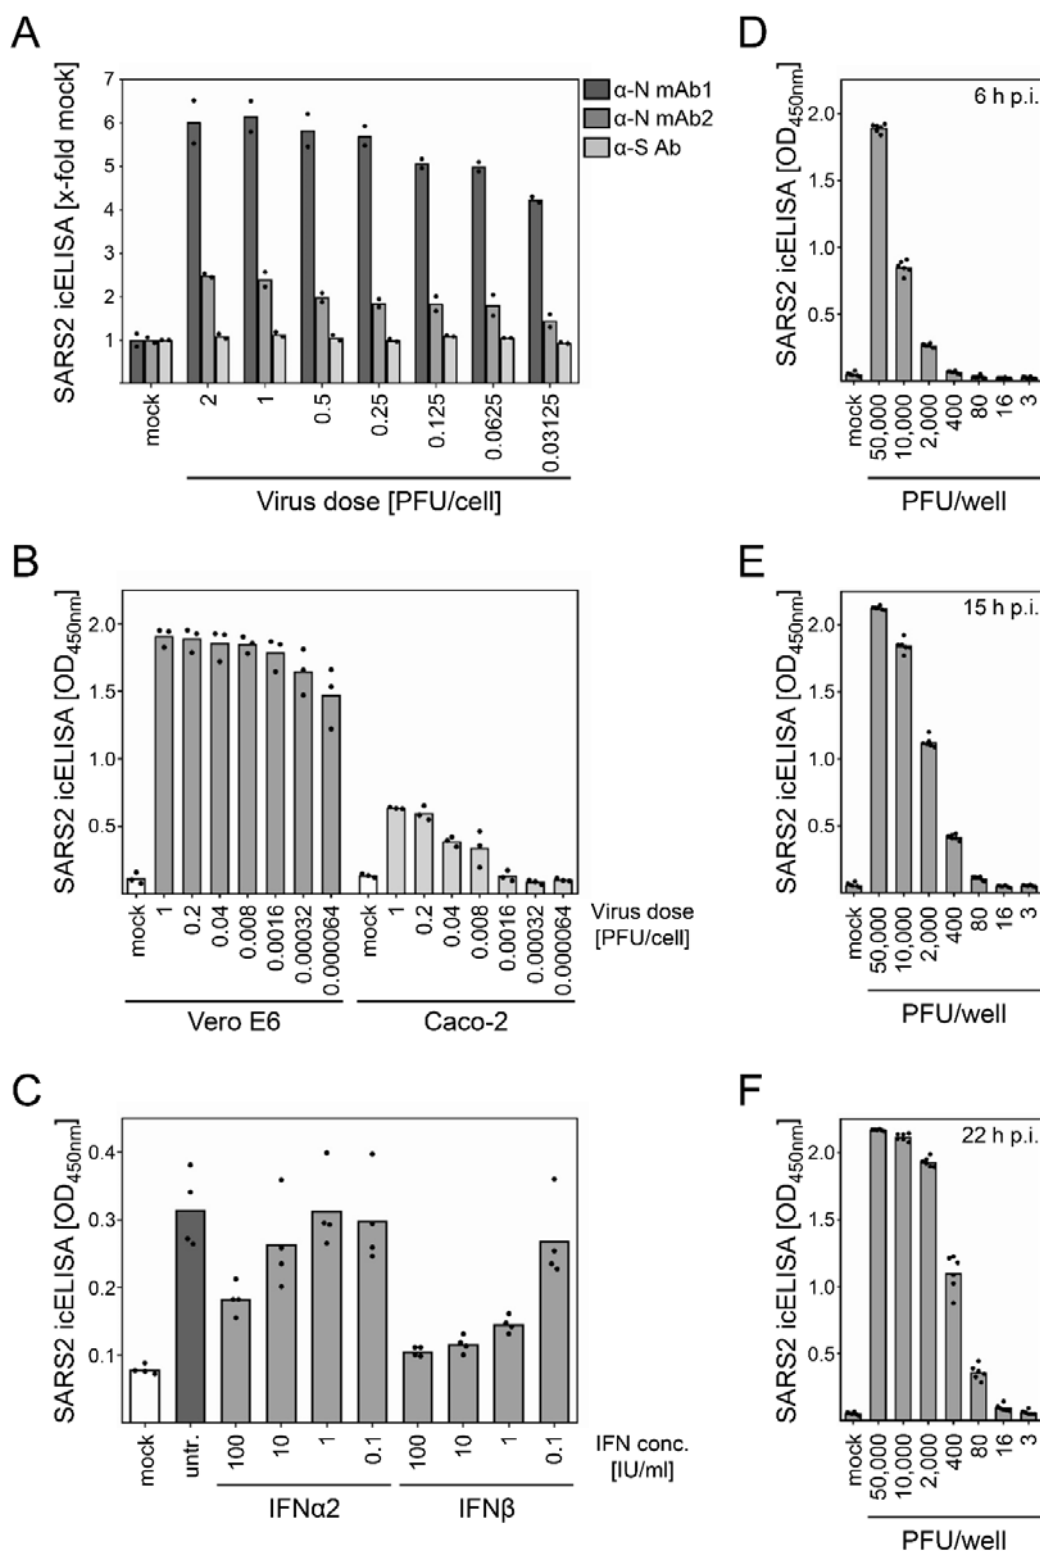

**Figure 1: The icELISA test allows quantification of SARS-CoV-2 replication and its inhibition by antiviral compounds**

(A) Caco-2 cells were infected with indicated doses of SARS-CoV-2. At 3 d p.i., cells were fixed and detected by icELISA using S- and N-specific primary antibodies. For all further icELISAs,  $\alpha$ -N mAb1 was used. (B) Vero E6 and Caco-2 cells were infected with indicated doses of SARS-CoV-2. At 3 d p.i., cells were analysed by icELISA. (C) Caco-2 cells were treated with indicated concentrations of IFN $\alpha$ 2 or IFN $\beta$ . At 3 h post treatment, cells were infected with SARS-CoV-2 (MOI 0.1). Viral replication was evaluated at 3 d p.i. by icELISA. (D - F) Vero E6 cells were infected with indicated doses of SARS-CoV-2. At 6, 15, and 22 h p.i. (D, E, and F, respectively), cells were analysed by icELISA. Bars depict the mean values. Dots show the values of the individual measurements.



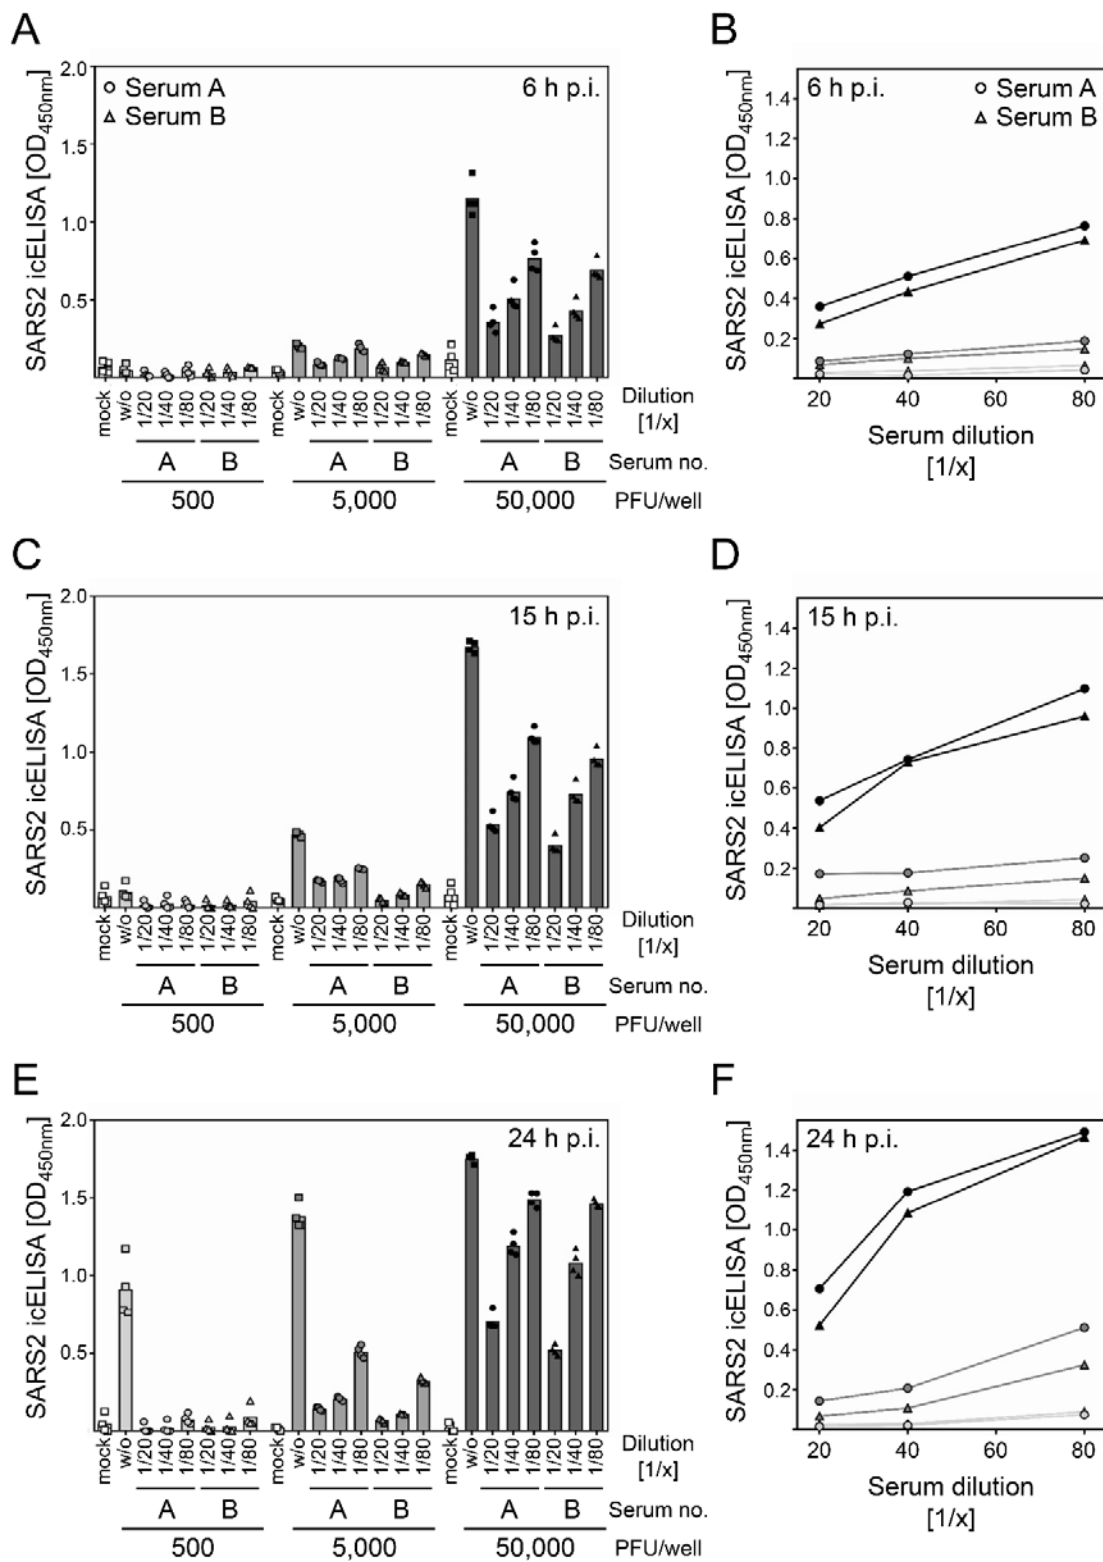

**Figure 2: The icNT allows the quantification of SARS-CoV-2 NAbs as early as 6 h p.i.**

(A - F) 500, 5000, and 50,000 PFU of SARS-CoV-2 were incubated with indicated dilutions of 2 convalescent sera for 1 h before Vero E6 cells were infected. At 6 h p.i. (A, B), 15 h p.i. (C, D), and 24 h p.i. (E, F), cells were analysed by icELISA to evaluate the neutralizing capacity of the sera. (A, C, E) Bars depict the mean values. Dots show the values of the individual measurements. (B, D, F) All mean values of the different serum dilutions and virus doses were depicted in one diagram to compare the influence of the input virus amount on the course of the curve. Light grey, 500 PFU. Grey, 5000 PFU. Dark grey, 50,000 PFU.

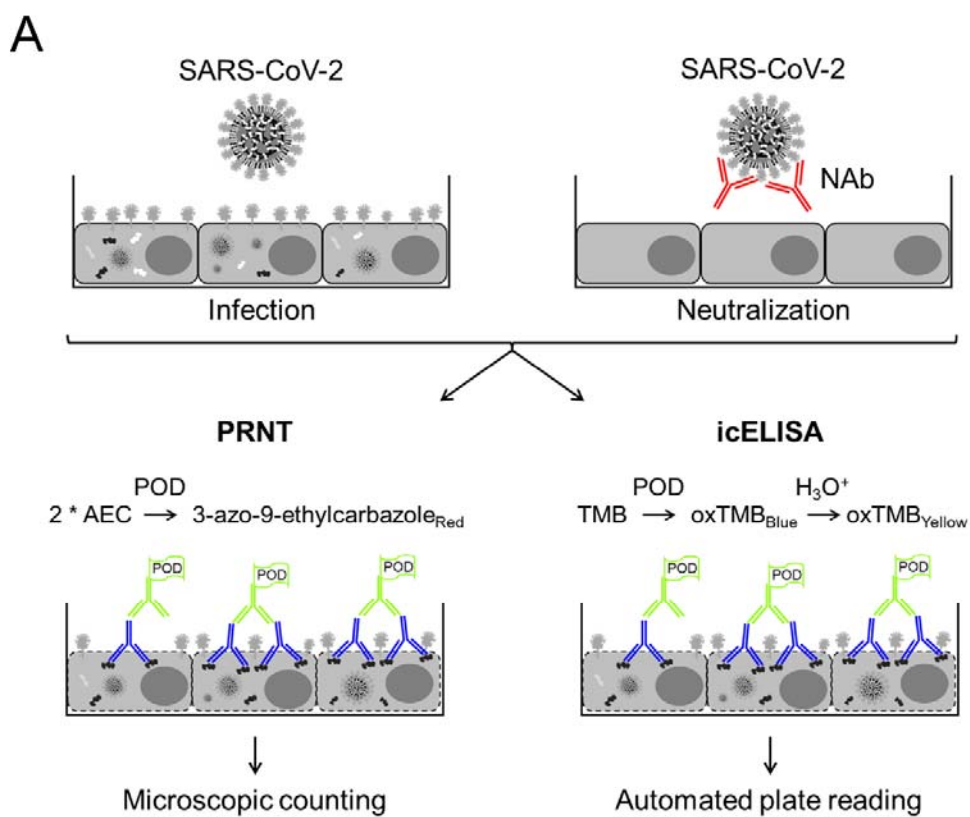

**B**

| Serum<br>[no] | 50% neutralisation titre [dilution 1/x] |      |
|---------------|-----------------------------------------|------|
|               | PRNT                                    | icNT |
| 1             | 256                                     | >256 |
| 2             | 0                                       | 0    |
| 3             | >256                                    | >256 |
| 4             | 0                                       | 0    |
| 5             | 128                                     | 128  |
| 6             | 0                                       | 0    |
| 7             | >256                                    | >256 |
| 8             | 0                                       | 0    |
| 9             | >256                                    | >256 |
| 10            | 0                                       | 0    |
| 11            | >256                                    | >256 |
| 12            | 0                                       | 0    |
| 13            | 128                                     | 128  |
| 14            | 0                                       | 0    |
| 15            | >256                                    | >256 |
| 16            | 0                                       | 0    |
| 17            | >256                                    | >256 |
| 18            | 0                                       | 0    |
| 19            | 128                                     | 256  |
| 20            | 0                                       | 0    |

Pearson's  $r$ : 0.965

**Figure 3: The icNT results correlate with the standard SARS-CoV-2 neutralization test**

(A) Schematic representation of AEC stain-based classic NT and icELISA-based icNT. NAb, neutralizing antibody. PRNT, plaque reduction neutralization test. POD, peroxidase. AEC, 3-amino-9-ethylcarbazole. TMB, tetramethylbenzidine. (B) 200 PFU of SARS-CoV-2 were incubated with different dilutions (1/8, 1/16, 1/32, 1/64, 1/128, 1/256) of 20 serum samples (10 negatively and 10 positively tested for SARS-CoV-2 IgG by Euroimmun ELISA) for 1 h before Vero E6 were infected. At 20 and 48 h p.i., neutralizing capacity was evaluated by icELISA and AEC staining with subsequent microscopic counting, respectively. The highest dilution capable to neutralize 50% of input virus was determined and results of PRNT and icNT were compared.

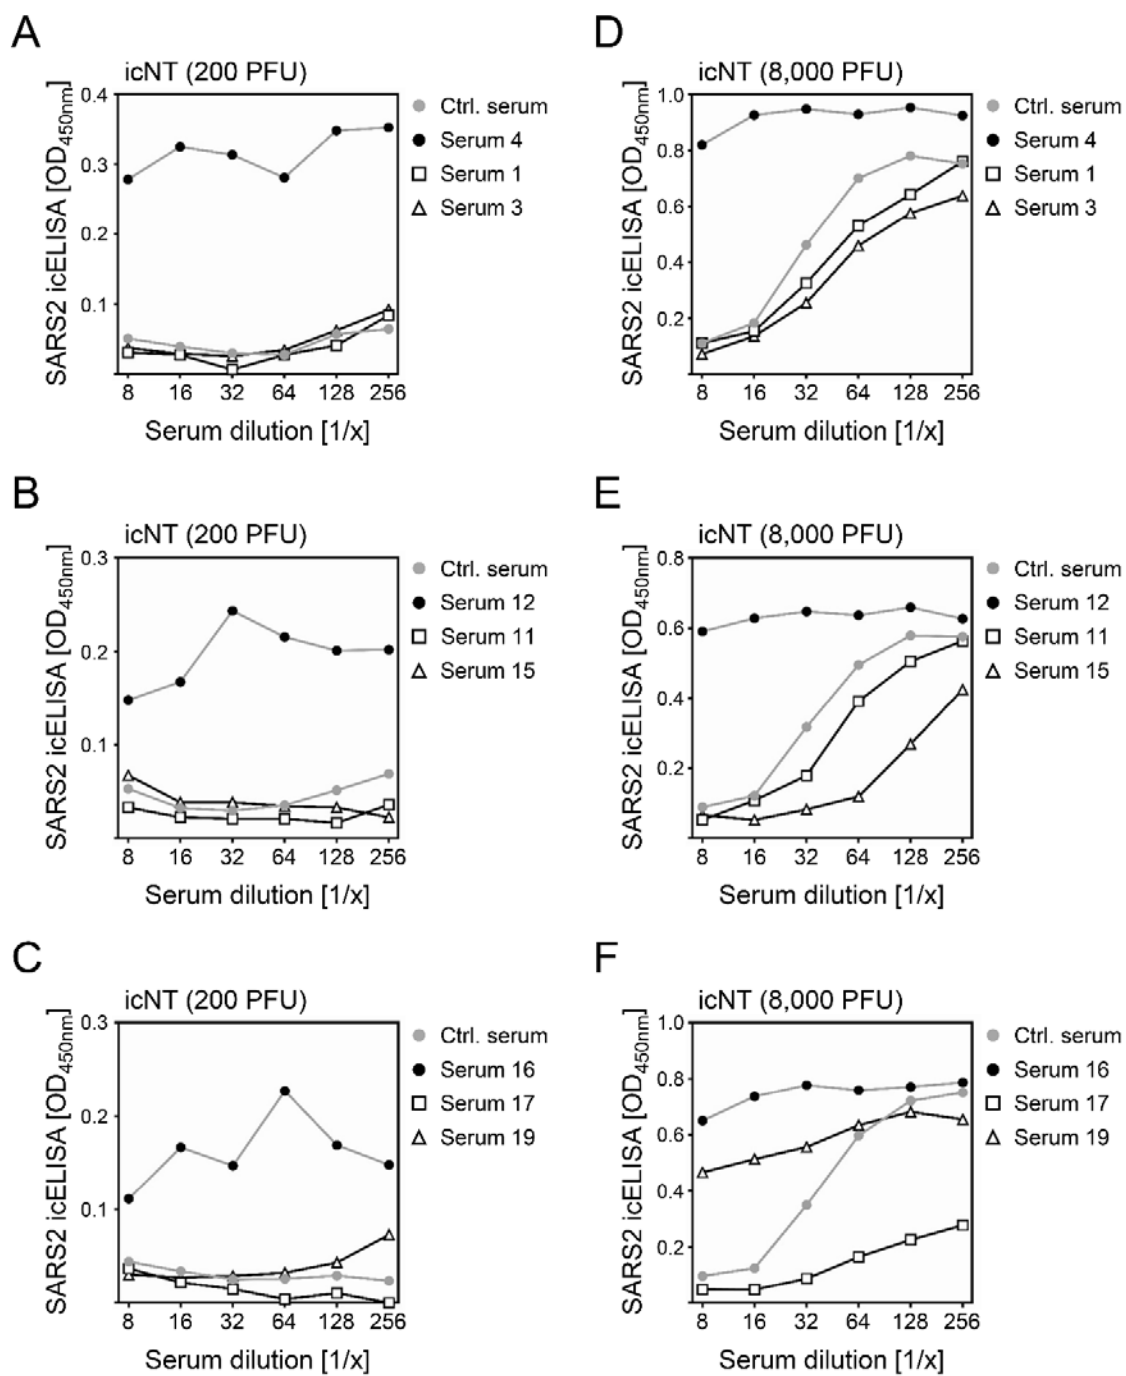

**Figure 4: The icNT provides superior resolution upon usage of increased virus doses**

(A - F) 200 or 8,000 PFU of SARS-CoV-2 were incubated with indicated dilutions of serum samples for 1 h before Vero E6 cells were infected. At 20 and 16 h p.i. (for 200 and 8,000 PFU, respectively), neutralizing capacity was evaluated by icELISA. Samples measured on the same plate are depicted in one diagram. The control serum was used as reference for all plates.

icNT icELISA Assay Protocol Trilling Lab

## SARS-CoV-2 icNT (steps 1 to 13) and icELISA (steps 6 to 13)

Materials:

- Vero E6 cells
- DMEM + Glucose/Glutamine/Pyruvate supplemented with 10% FCS, Pen/Strep
- Virus stock SARS-CoV-2 (titer: at least  $2 \times 10^5$  PFU/ml)
- Primary and secondary antibody ( $\alpha$ -N mAb,  $\alpha$ -mouse IgG POD-coupled)
- Paraformaldehyde (PFA)
- 1x PBS (PBS), 2x PBS
- Triton-X-100
- Tween-20
- Fetal Calf Serum (FCS)
- Tetramethylbenzidine (TMB)
- 0.5 M HCl
- Distilled or deionized water

Equipment:

- 96-well microplate
- 37°C CO<sub>2</sub> incubator
- Multichannel pipette
- Microplate reader

Notes:

- The wells of the microplate should not be allowed to dry at any point during the assay procedure.
- It is recommended to use a plate shaker during the incubation steps of the icELISA.

| REAGENT                            | REAGENT PREPATION INSTRUCTION                                                                                                                                                                                                                | WHEN TO PREPARE?                                    |
|------------------------------------|----------------------------------------------------------------------------------------------------------------------------------------------------------------------------------------------------------------------------------------------|-----------------------------------------------------|
| Wash Buffer                        | 500 $\mu$ l Tween-20 + 1 liter PBS                                                                                                                                                                                                           | At start of experiment                              |
| 8% (w/v) Paraformaldehyde Solution | 1.) Dissolve a 2x PBS tablet in 500 ml distilled or deionized water<br>2.) Add 80 gr PFA<br>3.) Use 4 M NaOH to dissolve the PFA in PBS<br>4.) Use HCl for pH adjustment (pH 7,4)<br>5.) Fill up with distilled or deionized water (1 liter) | At start of experiment (store in aliquots at -20°C) |
| Permeabilization Buffer            | For one 96-well microplate:<br>Dilute 250 $\mu$ l Triton-X-100 in 24.75 ml PBS.<br>Mix well by vortexing.                                                                                                                                    | Prepare immediately before use                      |
| Blocking Solution                  | 3% (v/v) FCS in PBS                                                                                                                                                                                                                          | Prepare immediately before use                      |
| Incubation Buffer                  | 1% (v/v) FCS in PBS                                                                                                                                                                                                                          | Prepare immediately before use                      |

### icNT icELISA Assay Protocol Trilling Lab

- 1.) Seed Vero E6 cells into 96-well microplates the day before.
  - Perform the test at least in duplicate, better in quadruplicate.
  - Include on every plate virus control and NT with control sera as references.
  - a. Cells should be 80 - 100% confluent at the day of infection.
  - b. Plates can be prepared outside of the BSL3 lab.
- 2.) Dilute the control serum and the sera to be tested 1/4, 1/8, 1/16, 1/32, 1/64, 1/128, 1/256.
  - Final serum dilutions are 1/8, 1/16, 1/32, 1/64, 1/128, 1/256, 1/512 after adding the virus solution.
  - Add further dilutions if needed.
  - a. Calculate the required total volume of the different dilutions (50µl per well) including at least 20% excess volume.
  - b. Prepare double the amount of the required volume of 1/4 serum dilution in medium (to do 2-fold serial dilutions).
  - c. Prepare stepwise the other dilutions.
  - d. Discard the excess amount of the last dilution.
- 3.) Prepare the virus solution (5.5 ml per 96-well microplate).
  - a. Calculate the required amount of total virus (8,000 - 10,000 PFU per well in 50µl).
  - b. Prepare the virus solution by diluting the required amount of virus stock in medium.
- 4.) Neutralisation: Incubation of virus with serum.
  - a. Add virus solution to the prepared serum dilutions (50µl serum dilution + 50µl virus solution per well).
  - b. Incubate for 60 - 90 min at 37 °C.
- 5.) Infection.
  - a. Aspirate the medium of the Vero E6 cells in the 96-well microplate.
  - b. Prevent cells from drying out during aspiration step.
  - c. Pipette the virus-serum solution into the wells (100µl per well).
  - d. Include the virus control and the control sera on every plate.
- 6.) Fix cells to microplate.
  - a. At 16 - 24 h p.i., add an equal volume of 8% paraformaldehyde solution to the wells containing culture media (= 4% paraformaldehyde solution)
  - b. Incubate for at least 2 h (or overnight) at room temperature.
    - For experiments using non-BSL3 organisms, 15 min of fixation is sufficient.
- 7.) Replace the lids with new ones. Wipe the plates thoroughly with 4% Dismozon. Plates can now be discharged from the BSL3 laboratory.



#### icNT icELISA Assay Protocol Trilling Lab

- 8.) Gently aspirate the fixing solution from the microplate. Wash the microplate 3 times with 300 $\mu$ l PBS per well. Add 200 $\mu$ l PBS to the wells. The microplate (sealed with parafilm) can now be stored at 4°C for several days.
- 9.) Permeabilize cells.
  - a. Prepare permeabilization buffer (for one microplate: dilute 250 $\mu$ l Triton-X-100 in 24.75 ml PBS).
  - b. Aspirate PBS and add 200 $\mu$ l of freshly prepared permeabilization buffer to each well.
  - c. Incubate for 30 min.
- 10.) Blocking.
  - a. Aspirate permeabilization buffer and add 100 $\mu$ l of blocking solution (3% FCS in PBS) to each well.
  - b. Incubate for 1-2 h.
- 11.) Incubation with primary antibody.
  - a. Prepare primary antibody ( $\alpha$ -SARS-CoV-2-N, 1:5000) by diluting stock antibody in the required volume of incubation buffer (1% FCS in PBS).
  - b. Aspirate blocking solution and add 50 $\mu$ l of antibody solution to each well.
  - c. Incubate for 2 h at room temperature or overnight at 4°C (sealed with parafilm).
- 12.) Incubation with secondary antibody.
  - a. Prepare antibody solution by diluting stock antibody in the required volume of incubation buffer (1% FCS in PBS).
  - b. Aspirate primary antibody solution. Wash the microplate 3 times with 250 $\mu$ l wash buffer per well.
  - c. Aspirate the wash buffer and add 50 $\mu$ l of secondary antibody solution to each well.
  - d. Incubate for 1-2 h at room temperature.
  - e. Aspirate secondary antibody solution. Wash 4 times with 250 $\mu$ l wash buffer per well.
- 13.) Signal measurement.
  - a. Prepare the required amount of TMB and 0.5 M HCl.
  - b. Aspirate the last wash. Make sure that you have completely removed the liquid.
  - c. Add 100 $\mu$ l TMB (blue color development).
  - d. Stop the reaction with 100 $\mu$ l of 0.5 M HCl (by the time the uninfected wells [mock] are starting to turn blue as well).
  - e. Record data at 450 nm absorbance, 620 nm reference using a microplate reader.
